# Supplementary material for: The advertised price of cigarette packs in retail outlets across Australia before and after the implementation of plain packaging: a repeated measures observational study
Source: PubMed Central journal article supplement — Tob Control. 2015 Apr;24(Suppl 2):ii82–9. doi: 10.1136/tobaccocontrol-2014-051950 (PMC4392197; doi:10.1136/tobaccocontrol-2014-051950), 2015-04
Supplement: tobaccocontrol-2014-051950-s1.pdf [file tobaccocontrol-2014-051950-s1.pdf]

## Appendix

**Table A1** Marginal mean inflation-adjusted stick prices (\$Aug2013) by PP/CPI phase and market segment for the premium most-prominent brands, estimated using linear mixed models, with post-estimation Wald test for main effects and within-group comparisons

|                                   | <b>BATA</b><br>(n=2393)<br><br>Stick price (95% CI) | <b>Imperial Tobacco</b><br>(n=350)<br><br>Stick price (95% CI) | <b>Philip Morris</b><br>(n=789)<br><br>Stick price (95% CI) |
|-----------------------------------|-----------------------------------------------------|----------------------------------------------------------------|-------------------------------------------------------------|
| <b>Plain packaging/ CPI phase</b> | (Wald $\chi^2=589.64$ , $p<0.001$ )                 | (Wald $\chi^2=238.25$ , $p<0.001$ )                            | (Wald $\chi^2=408.90$ , $p<0.001$ )                         |
| May-12 to Jul-12 (Ref)            | \$0.745 (\$0.740-\$0.750)                           | \$0.737 (\$0.725-\$0.750)                                      | \$0.736 (\$0.730-\$0.742)                                   |
| Aug-12 to Oct-12                  | \$0.749 (\$0.744-\$0.754)**                         | \$0.742 (\$0.729-\$0.755)*                                     | \$0.745 (\$0.739-\$0.751)***                                |
| Nov-12 to Jan-13                  | \$0.748 (\$0.744-\$0.752)                           | \$0.741 (\$0.727-\$0.754)                                      | \$0.746 (\$0.740-\$0.753)***                                |
| Feb-13 to Apr-13                  | \$0.779 (\$0.775-\$0.784)***                        | \$0.769 (\$0.754-\$0.783)***                                   | \$0.775 (\$0.767-\$0.782)***                                |
| May-13 to Jul-13                  | \$0.783 (\$0.778-\$0.788)***                        | \$0.765 (\$0.750-\$0.781)***                                   | \$0.788 (\$0.780-\$0.795)***                                |
| Aug-13                            | \$0.788 (\$0.782-\$0.795)***                        | \$0.770 (\$0.752-\$0.788)***                                   | \$0.809 (\$0.799-\$0.819)***                                |

\* $p<0.05$ ; \*\* $p<0.01$ ; \*\*\* $p<0.001$ . 95% CI: 95% confidence interval.

All models controlled for fixed effects of store type, city, area SES, and random intercepts for store and random effects of time.

**Table A2** Marginal mean inflation-adjusted stick prices (\$Aug2013) by PP/CPI phase, pack size category and manufacturer for the cheapest-listed packs, estimated using linear mixed models, with post-estimation Wald test for main effects and within-group comparisons

|                                       | By pack size category                               |                                                              |                                                             | By manufacturer                                    |                                                                |                                                             |                                                              |
|---------------------------------------|-----------------------------------------------------|--------------------------------------------------------------|-------------------------------------------------------------|----------------------------------------------------|----------------------------------------------------------------|-------------------------------------------------------------|--------------------------------------------------------------|
|                                       | Packs of 20s<br>(n=4872)<br>Stick price<br>(95% CI) | Packs of 21s, 22s, 23s<br>(n=581)<br>Stick price<br>(95% CI) | Pack of 25s, 26s, 30s<br>(n=406)<br>Stick price<br>(95% CI) | BATA brands<br>(n=1918)<br>Stick price<br>(95% CI) | Imperial Tobacco brands<br>(n=1922)<br>Stick price<br>(95% CI) | Philip Morris brands<br>(n=1850)<br>Stick price<br>(95% CI) | ‘Other’ manufacturers^<br>(n=169)<br>Stick price<br>(95% CI) |
| <b>Plain packaging/<br/>CPI phase</b> | (Wald $\chi^2=343.13$ ,<br>p<0.001)                 | (Wald $\chi^2=226.17$ ,<br>p<0.001)                          | (Wald $\chi^2=62.61$ ,<br>p<0.001)                          | (Wald $\chi^2=123.88$ ,<br>p<0.001)                | (Wald $\chi^2=251.44$ ,<br>p<0.001)                            | (Wald $\chi^2=113.47$ ,<br>p<0.001)                         | (Wald $\chi^2=1.66$ ,<br>p=0.894)                            |
| May-12 to Jul-12<br>(Ref)             | \$0.576<br>(\$0.570-\$0.581)                        | \$0.552<br>(\$0.544-\$0.560)                                 | \$0.571<br>(\$0.564-\$0.579)                                | \$0.580<br>(\$0.573-\$0.587)                       | \$0.551<br>(\$0.544-\$0.558)                                   | \$0.588<br>(\$0.581-\$0.595)                                | \$0.544<br>(\$0.521-\$0.567)                                 |
| Aug-12 to Oct-12                      | \$0.570<br>(\$0.565-\$0.576)**                      | \$0.542<br>(\$0.535-\$0.548)***                              | \$0.584<br>(\$0.575-\$0.592)**                              | \$0.585<br>(\$0.579-\$0.592)                       | \$0.555<br>(\$0.548-\$0.561)                                   | \$0.576<br>(\$0.570-\$0.583)***                             | \$0.541<br>(\$0.522-\$0.561)                                 |
| Nov-12 to Jan-13                      | \$0.573<br>(\$0.568-\$0.578)                        | \$0.542<br>(\$0.537-\$0.548)**                               | \$0.574<br>(\$0.563-\$0.585)                                | \$0.577<br>(\$0.571-\$0.583)                       | \$0.560<br>(\$0.553-\$0.566)**                                 | \$0.569<br>(\$0.563-\$0.575)***                             | \$0.546<br>(\$0.530-\$0.562)                                 |

|                  |                                 |                                 |                                 |                                 |                                 |                                |                              |
|------------------|---------------------------------|---------------------------------|---------------------------------|---------------------------------|---------------------------------|--------------------------------|------------------------------|
| Feb-13 to Apr-13 | \$0.604<br>(\$0.599-\$0.609)*** | \$0.572<br>(\$0.566-\$0.578)*** | \$0.604<br>(\$0.589-\$0.620)*** | \$0.611<br>(\$0.604-\$0.617)*** | \$0.593<br>(\$0.587-\$0.600)*** | \$0.591<br>(\$0.585-\$0.597)   | \$0.537<br>(\$0.528-\$0.547) |
| May-13 to Jul-13 | \$0.599<br>(\$0.593-\$0.604)*** | \$0.566<br>(\$0.558-\$0.573)*   | \$0.624<br>(\$0.604-\$0.644)*** | \$0.600<br>(\$0.593-\$0.607)*** | \$0.595<br>(\$0.588-\$0.601)*** | \$0.588<br>(\$0.581-\$0.596)   | \$0.535<br>(\$0.530-\$0.541) |
| Aug-13           | \$0.599<br>(\$0.592-\$0.607)*** | \$0.570<br>(\$0.560-\$0.579)*   | \$0.625<br>(\$0.595-\$0.655)**  | \$0.595<br>(\$0.584-\$0.606)*   | \$0.593<br>(\$0.584-\$0.602)*** | \$0.603<br>(\$0.593-\$0.613)** | \$0.535<br>(\$0.529-\$0.541) |

\*p<0.05; \*\*p<0.01; \*\*\*p<0.001. 95% CI: 95% confidence interval.

^All models controlled for fixed effects of store type, city, area SES, and random intercepts for store and random effects of time, except the *'Other' manufacturers* model which excludes random store-level intercepts, as the model would not converge.
